# Supplementary material for: Highly homogeneous bimetallic core–shell Au@Ag nanoparticles with embedded internal standard fabrication using a microreactor for reliable quantitative SERS detection
Source: Royal Society of Chemistry journal article supplement (doi:10.1039/d2qm01202b), 2023-01-01
Supplement: d2qm01202b1.pdf [file d2qm01202b1.pdf]

## Supplement Information

### Highly homogeneous core-shell Au@Ag nanoparticles with embedded internal standard fabrication by microreactor for reliable quantitative SERS detection

Suyang Li<sup>a||</sup>, Junjie Chen<sup>bl</sup>, Wanbing Xu<sup>a</sup>, Biao Sun<sup>c</sup>, Jiechen Wu<sup>d</sup>, Qiang Chen<sup>bt</sup>, Pei Liang<sup>at</sup>

a. College of Metrology and Measurement Engineering, China Jiliang University, 310018, Hangzhou, China.

b. College of Optical and Electronic Technology, China Jiliang University, 310018, Hangzhou, China.

c. School of Electrical and Information Engineering, Tianjin University, 300072, Tianjin, China.

d. Department of Sustainable Development, Environmental Science and Engineering (SEED), KTH Royal Institute of Technology, SE-100 44, Stockholm, Sweden.

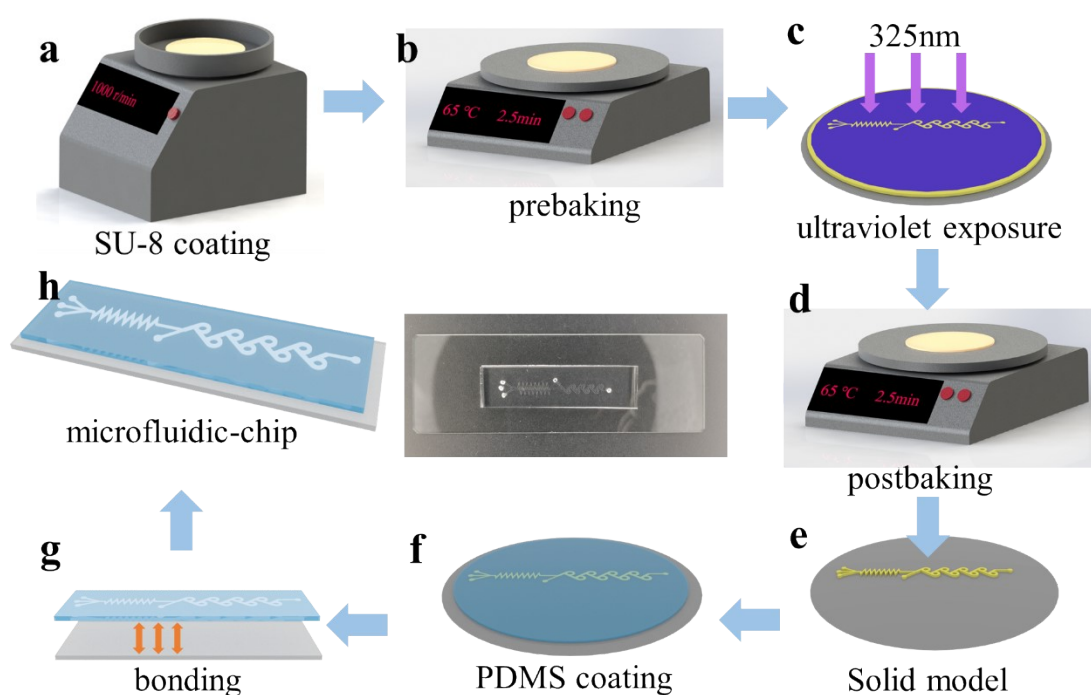

Figure. S1. Method for manufacturing microfluidic-chip (a-h).

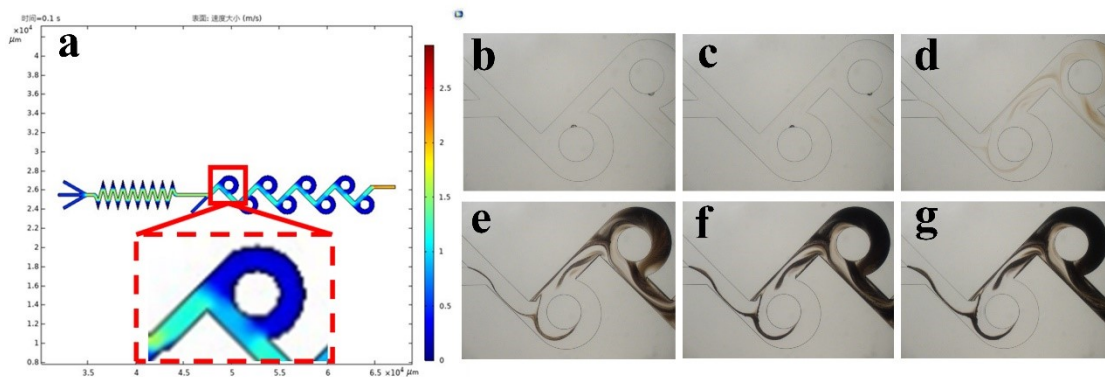

**Figure.S2.** Flow velocity simulation diagram of microfluidic reactor (a); Ring mixing in the microfluidic reactor ( b-g represents the reaction of 0s,1s,10s,60s,2min and 2.5min, respectively).

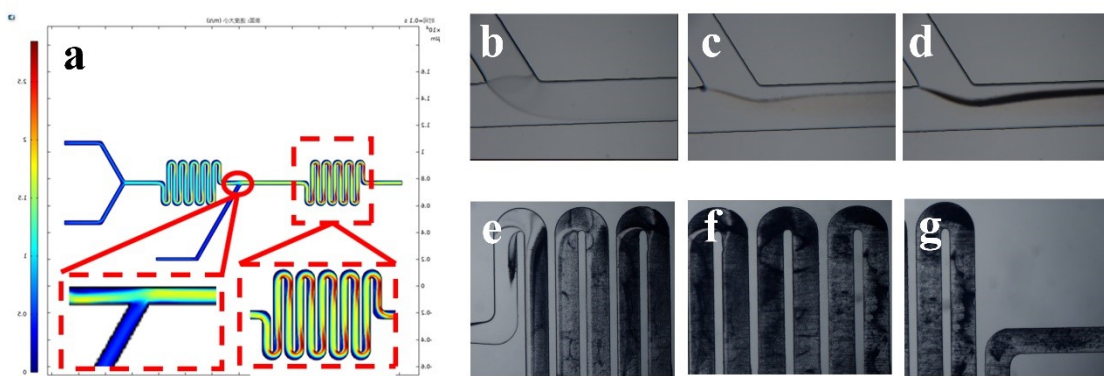

**Figure. S3.** Flow velocity simulation diagram of S-channel in microfluidic reactor (a); Actual synthesis of microfluidic reactor: fluid junction (b-d stands for 0, 1 and 10s, respectively), S-channel mixing (e-g).

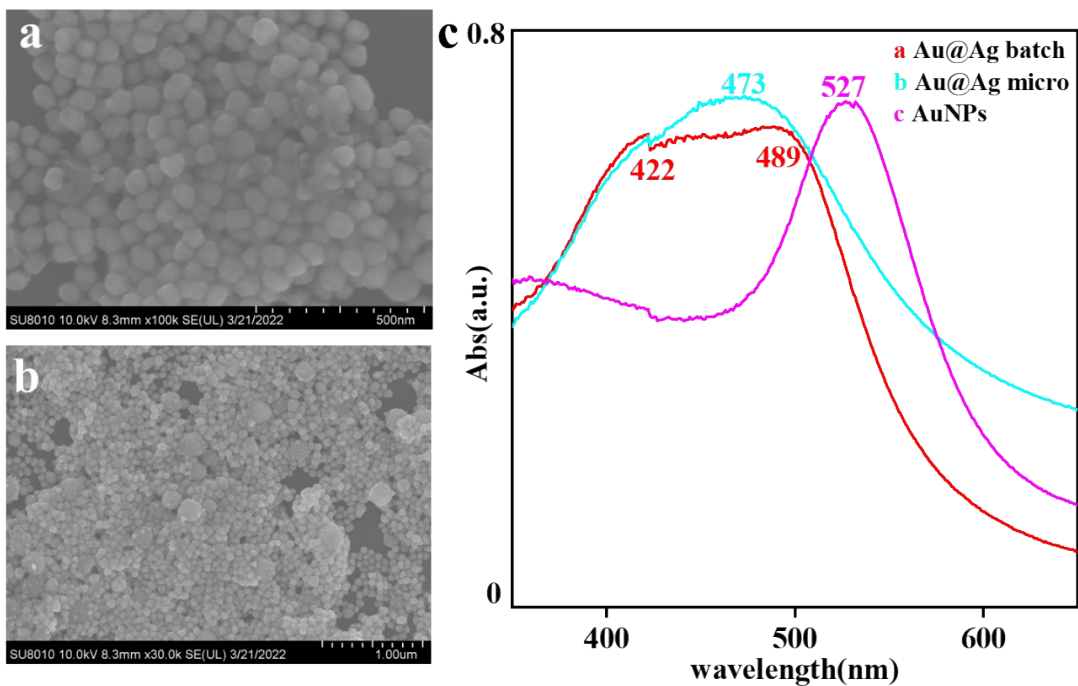

**Fig. S4.** The SEM images of gold and silver core shells were synthesized by beaker batch. Uv-vis spectra of core-shell nanoparticle solutions obtained by microfluidic and batch synthesis of gold sol and Au@Au, respectively.

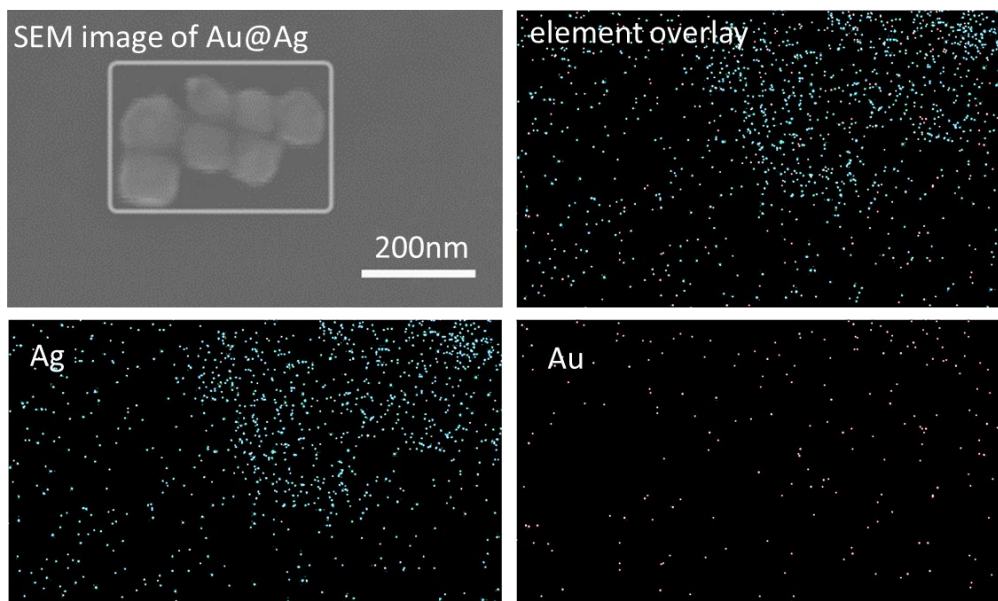

**Fig. S5.** Typical EDS element diagram Au@Ag core-shell nanoparticles for microfluidic synthesis

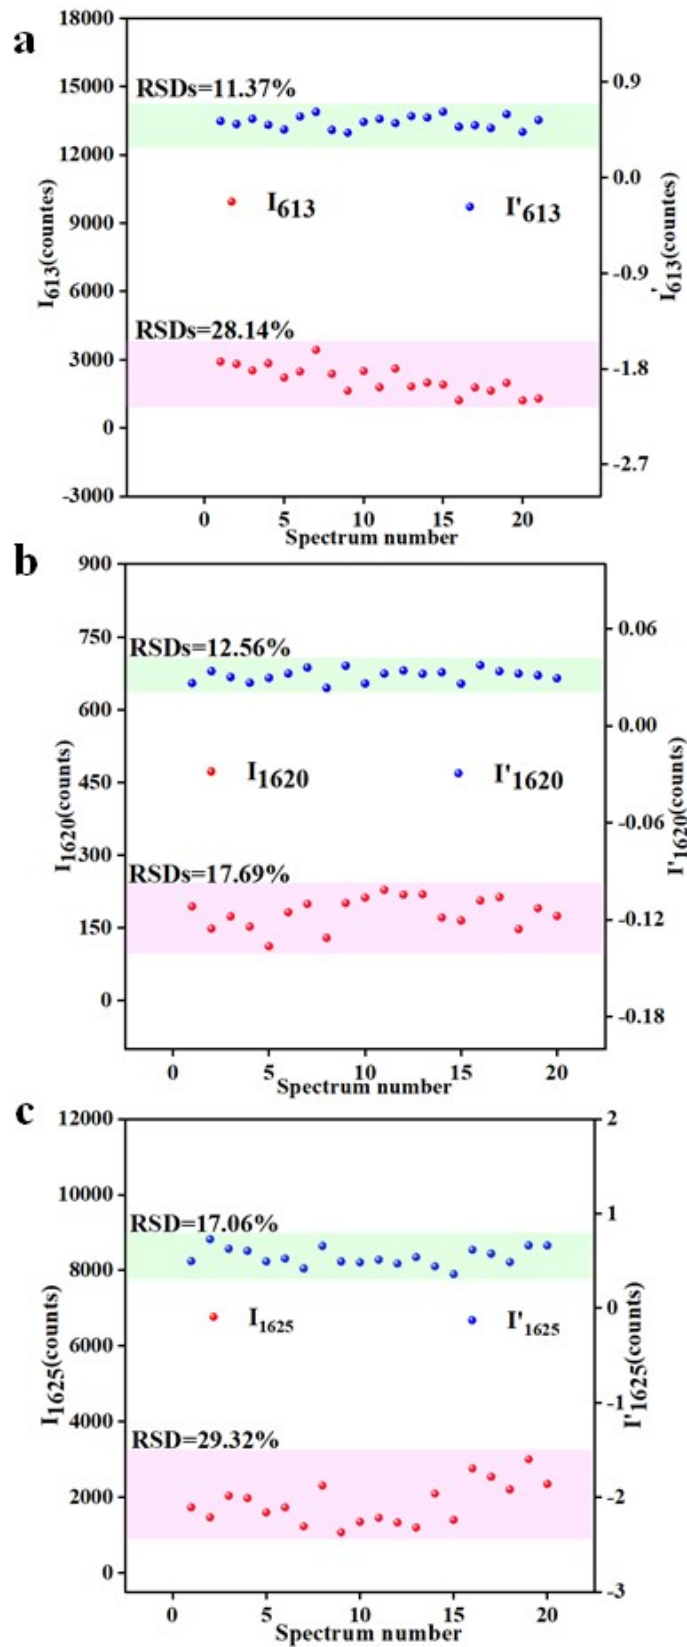

Fig. S6. The random 20 SERS signal distributions from R6G(a)、CV(b)、MB(c) ( $10^{-6}$ M) of Au@DTNB@Ag.

**Correlation coefficient R<sup>2</sup>**

In this paper, we use R<sup>2</sup> as a coefficient to measure the linear relationship between the concentration C and the Raman peak intensity of the sample, and the formula for the measurement coefficient R<sup>2</sup> is expressed as follows:

$$R^2 = \frac{\sum_{i=1}^n (S_i - \bar{S})^2}{\sum_{i=1}^n (S_i - \bar{S})^2} \frac{\sum_{i=1}^n (S_i - \hat{S}_i)^2}{\sum_{i=1}^n (S_i - \bar{S})^2} \dots\dots\dots(S1)$$

where  $\sum_{i=1}^n (S_i - \bar{S})^2$  is sum of squares for total,  $\sum_{i=1}^n (S_i - \hat{S}_i)^2$  is regression sum of squares, and  $\sum_{i=1}^n (S_i - \bar{S}_i)^2$  is residual sum of squares.

**Table. S1.** SERS analysis of R6G、 CV and MB in Au@DTNB@Ag core-molecule-shell substrate.

| Analyte | Raman intensity                      | Relationship                                        | LOD(M)             |
|---------|--------------------------------------|-----------------------------------------------------|--------------------|
| R6G     | I <sub>613</sub>                     | LogY=7500.92+773.86LogC<br>R <sup>2</sup> = 0.903   | 1*10 <sup>-8</sup> |
|         | I <sub>613</sub> /I <sub>1335</sub>  | LogY=0.8452+0.0919LogC<br>R <sup>2</sup> = 0.972    |                    |
| CV      | I <sub>1620</sub>                    | LogY=9843.99+1605.51LogC<br>R <sup>2</sup> = 0.973  | 1*10 <sup>-7</sup> |
|         | I <sub>1620</sub> /I <sub>1335</sub> | LogY=1.7790+0.2942LogC<br>R <sup>2</sup> = 0.994    |                    |
| MB      | I <sub>1625</sub>                    | LogY=29343.46+4155.16LogC<br>R <sup>2</sup> = 0.933 | 1*10 <sup>-8</sup> |
|         | I <sub>1625</sub> /I <sub>1335</sub> | LogY=7.0245+0.9908LogC<br>R <sup>2</sup> = 0.994    |                    |

**Table S2** Assignments of Raman bands of R6G in SERS and normal Raman conditions.

| Raman | SERS | Assignment                                                |
|-------|------|-----------------------------------------------------------|
| 1649  | 1651 | xanthen ring stretch;C-H in-plane bending                 |
| 1573  | 1577 | xanthen ring stretch;N-H in-plane bending                 |
| 1502  | 1512 | xanthen ring stretch;C-N stretch;C-H bend;N-H bend        |
| 1362  | 1364 | xanthen ring stretch; C-H in-plane bending                |
| 1304  | 1312 | xanthen ring breath N-H in-plane bending; CH2 wag         |
| 1185  | 1184 | xanthen ring in-plane deformations                        |
| 773   | 775  | C-H out of plane bend; xanthen ring in-plane deformations |

|     |     |                                                                              |
|-----|-----|------------------------------------------------------------------------------|
| 613 | 613 | xanthene ring in-plane deformations; xanthene ring out-of-plane deformations |
|-----|-----|------------------------------------------------------------------------------|

**Table S3** Assignments of Raman bands of MB in SERS and normal Raman conditions.

| Raman | SERS | Assignment                     |
|-------|------|--------------------------------|
| 1617  | 1623 | (C–C) ring stretching          |
| 1597  | 1395 | (C–C) ring stretching          |
| 1513  | 1299 | (C–C) antisymmetric stretching |
| 1184  | 1184 | (C–N) stretching               |
| 1121  | 1136 | (C–H) out-of-plane bending     |
| 670   | 667  | (C–H) out-of-plane bending     |
| 612   | 592  | (C–S–C) skeletal deformation   |
| 502   | 498  | (C–N–C) skeletal deformation   |
| 449   | 445  | (C–N–C) skeletal deformation   |

**Table S4** Assignments of Raman bands of CV in SERS and normal Raman conditions.

| Raman | SERS | Assignment                                      |
|-------|------|-------------------------------------------------|
| 1612  | 1618 | C-phenyl in-plane antisymmetric stretching      |
| 1580  | 1583 | C-phenyl in-plane antisymmetric stretching      |
| 1530  | 1530 | Phenyl-N antisymmetric stretching               |
| 1376  | 1368 | C-N, Phenyl-C-phenyl antisymmetric stretching   |
| 1168  | 1175 | C-phenyl, C-H in-plane antisymmetric stretching |
| 908   | 911  | Phenyl ring breathing mode                      |
| 796   | 803  | Phenyl-H out-of-plane antisymmetric bending     |
| 722   | 728  | C-N-C symmetric stretching                      |
